# Supplementary material
Source: PubMed Central journal article supplement (PMC9003876)
Supplement: NIHMS1789062-supplement-Casas_Transfusion_Supplemental_Material.pdf [file NIHMS1789062-supplement-Casas_Transfusion_Supplemental_Material.pdf]

| Antigen | Antigen prevalence |        |            | Statistical analysis (p-value) |                                  |
|---------|--------------------|--------|------------|--------------------------------|----------------------------------|
|         | Patients with SCD  | Blacks | Caucasians | Patients with SCD vs. Blacks   | Patients with SCD vs. Caucasians |
| c       | 0.986              | 0.98   | 0.8        | 0.6246                         | <0.0001                          |
| C       | 0.226              | 0.27   | 0.68       | 0.1302                         | <0.0001                          |
| e       | 0.992              | 0.98   | 0.98       | 0.1767                         | 0.1767                           |
| E       | 0.175              | 0.22   | 0.29       | 0.086                          | <0.0001                          |
| Kell    | 0.016              | 0.02   | 0.09       | 0.812                          | <0.0001                          |
| k       | 1.000              | 1      | 0.998      | 1                              | 1                                |
| Kpa     | 0.000              | 0.0001 | 0.02       | 0.0619                         | 0.0019                           |
| Kpb     | 1.000              | 1      | 1          | 1                              | 1                                |
| Jsa     | 0.166              | 0.2    | 0.0001     | 0.1882                         | <0.0001                          |
| Jsb     | 0.996              | 0.99   | 1          | 0.4515                         | 0.4995                           |
| Jka     | 0.907              | 0.92   | 0.77       | 0.5659                         | <0.0001                          |
| Jkb     | 0.489              | 0.49   | 0.74       | 0.9741                         | <0.0001                          |
| Fya     | 0.123              | 0.1    | 0.66       | 0.2659                         | <0.0001                          |
| Fyb     | 0.174              | 0.23   | 0.83       | 0.0325                         | <0.0001                          |
| M       | 0.733              | 0.74   | 0.78       | 0.8284                         | 0.1031                           |
| N       | 0.730              | 0.75   | 0.72       | 0.5242                         | 0.8056                           |
| S       | 0.254              | 0.31   | 0.55       | 0.0613                         | <0.0001                          |
| s       | 0.935              | 0.93   | 0.89       | 0.8202                         | 0.0192                           |
| V       | 0.247              | 0.3    | 0.01       | 0.0743                         | <0.0001                          |
| VS      | 0.281              | 0.3    | 0.0001     | 0.5751                         | <0.0001                          |
| U       | 0.990              | 0.99   | 0.999      | 1                              | 0.0619                           |
| Lua     | 0.037              | 0.05   | 0.08       | 0.3934                         | 0.006                            |
| Lub     | 1.000              | 0.998  | 0.998      | 0.3215                         | 1                                |
| Dia     | 0.000              | 0.0001 | 0.0001     | 1                              | 1                                |
| Dib     | 1.000              | 1      | 1          | 1                              | 1                                |
| Coa     | 1.000              | 0.999  | 0.999      | 1                              | 1                                |
| Cob     | 0.016              | 0.1    | 0.1        | <0.0001                        | <0.0001                          |
| Doa     | 0.433              | 0.55   | 0.67       | 0.0003                         | <0.0001                          |
| Dob     | 0.931              | 0.89   | 0.82       | 0.0338                         | <0.0001                          |
| Joa     | 0.994              | 0.99   | 1          | 0.7226                         | 0.2492                           |
| Hy      | 0.998              | 0.99   | 1          | 0.2173                         | 1                                |
| Lwa     | 1.000              | 1      | 1          | 1                              | 1                                |
| Lwb     | 0.000              | NA     | 0.01       | NA                             | 0.0619                           |
| Sc1     | 1.000              | 0.99   | 0.99       | 0.0619                         | 0.0619                           |
| Sc2     | 0.000              | NA     | 0.01       | NA                             | 0.0619                           |

**Table S1. Red blood cell antigen prevalence.** Antigen prevalence among this cohort was compared to reported prevalence for Blacks and Caucasians determined by serological typing in <sup>16</sup>. Statistical analysis of frequency was performed using bivariate comparisons of categorical variables using a two-tailed chi-square test with Yates' correction or a fisher's exact test. NA, not available.

| Antigen    | UPIN       | Historical Phenotype | Genotype Predicted | Repeat Serologic Phenotype | Comments                                                                                |
|------------|------------|----------------------|--------------------|----------------------------|-----------------------------------------------------------------------------------------|
| <b>c</b>   | 404        | -                    | +                  | +                          |                                                                                         |
| <b>C</b>   | 492        | +                    | -                  | -                          |                                                                                         |
|            | 293        | +                    | -                  | -                          |                                                                                         |
| <b>e</b>   | 543        | -                    | +                  | +                          |                                                                                         |
|            | 501        | -                    | +                  | +                          |                                                                                         |
|            | 166        | -                    | +                  | NP                         | <i>RHCE*ceJAL</i> , weak e expression                                                   |
| <b>E</b>   | 199        | +                    | -                  | -                          |                                                                                         |
| <b>Jka</b> | 7          | -                    | +                  | +                          | <i>JK*A 130 G&gt;A, (JK*01W.01)</i> , weak expression                                   |
|            | 480        | -                    | +                  | +                          |                                                                                         |
| <b>Jkb</b> | 423        | +                    | -                  | -                          |                                                                                         |
|            | 148        | +                    | -                  | -                          |                                                                                         |
|            | 522        | +                    | -                  | -                          |                                                                                         |
|            | 164        | +                    | -                  | -                          |                                                                                         |
|            | 39         | +                    | -                  | -                          |                                                                                         |
|            | 225        | +                    | -                  | -                          |                                                                                         |
|            | 293        | +                    | -                  | -                          |                                                                                         |
|            | 502        | +                    | -                  | -                          |                                                                                         |
|            | 199        | +                    | -                  | -                          |                                                                                         |
|            | 431        | +                    | -                  | -                          |                                                                                         |
|            | 199        | -                    | +                  | +                          |                                                                                         |
|            | 346        | -                    | +                  | +                          |                                                                                         |
|            | 611        | -                    | +                  | -                          | <i>JK*B 191 G&gt;A, (JK*02N.09)</i> silencing mutation                                  |
|            | <b>Fya</b> | 252                  | +                  | -                          | -                                                                                       |
| 492        |            | +                    | -                  | -                          |                                                                                         |
| 39         |            | +                    | -                  | -                          |                                                                                         |
| <b>Fyb</b> | 492        | +                    | -                  | -                          |                                                                                         |
|            | 561        | +                    | -                  | -                          |                                                                                         |
|            | 39         | +                    | -                  | -                          |                                                                                         |
|            | 590        | -                    | +                  | w+                         | Heterozygous for <i>FY</i> GATA site mutation                                           |
|            | 519        | -                    | +                  | w+                         | Heterozygous for <i>FY</i> GATA site mutation                                           |
|            | 566        | -                    | +                  | w+                         | Heterozygous for <i>FY</i> GATA site mutation                                           |
|            | 148        | -                    | +                  | 1+                         | Heterozygous for <i>FY</i> GATA site mutation                                           |
|            | 192        | -                    | +                  | 1+                         | Heterozygous for <i>FY</i> GATA site mutation                                           |
|            | 191        | -                    | +                  | 1+                         | Heterozygous for <i>FY</i> GATA site mutation                                           |
|            | 451        | -                    | +                  | 2+                         | Heterozygous for <i>FY</i> GATA site mutation                                           |
|            | 397        | -                    | +                  | +*                         | Heterozygous for <i>FY</i> GATA site mutation                                           |
|            | 392        | -                    | +                  | +*                         | Heterozygous for <i>FY</i> GATA site mutation                                           |
|            | 83         | -                    | +                  | +*                         | Heterozygous for <i>FY</i> GATA site mutation                                           |
|            | 409        | -                    | +                  | NA                         | Heterozygous for <i>FY</i> GATA site mutation                                           |
|            | 578        | -                    | w+                 | NP                         | Heterozygous for <i>FY</i> GATA site mutation<br>Heterozygous for <i>FY*X</i> (265 C>T) |

|          |     |   |    |    |                                                                                          |
|----------|-----|---|----|----|------------------------------------------------------------------------------------------|
|          | 447 | - | w+ | NP | Heterozygous for <i>FY</i> GATA site mutation<br>Heterozygous for <i>FY</i> *X (265 C>T) |
| <b>M</b> | 615 | + | -  | -  |                                                                                          |
|          | 62  | + | -  | -  |                                                                                          |
|          | 423 | + | -  | -  |                                                                                          |
|          | 127 | + | -  | -  |                                                                                          |
|          | 379 | + | -  | -  |                                                                                          |
|          | 140 | + | -  | -  |                                                                                          |
|          | 293 | + | -  | -  |                                                                                          |
|          | 167 | - | +  | +  |                                                                                          |
|          | 132 | - | +  | +  |                                                                                          |
|          | 270 | - | +  | +  |                                                                                          |
| <b>N</b> | 219 | + | -  | -  |                                                                                          |
|          | 326 | + | -  | -  |                                                                                          |
|          | 472 | + | -  | -  |                                                                                          |
|          | 522 | + | -  | -  |                                                                                          |
|          | 164 | + | -  | -  |                                                                                          |
|          | 498 | + | -  | -  |                                                                                          |
|          | 521 | + | -  | +  | Under investigation                                                                      |
|          | 247 | + | -  | NA |                                                                                          |
|          | 39  | - | +  | +  |                                                                                          |
|          | 371 | - | +  | +  |                                                                                          |
| <b>S</b> | 415 | + | -  | -  |                                                                                          |
|          | 548 | - | +  | +  |                                                                                          |
|          | 519 | - | +  | +  |                                                                                          |
|          | 236 | - | +  | +  |                                                                                          |
|          | 91  | - | +  | +  |                                                                                          |
|          | 448 | - | +  | +  |                                                                                          |
|          | 311 | - | +  | +  |                                                                                          |
| <b>s</b> | 5   | + | -  | -  |                                                                                          |
|          | 508 | - | +  | +  |                                                                                          |
|          | 351 | - | +  | +  |                                                                                          |

**Table S2. Seventy-one discrepancies between historical RBC antigen phenotype determined by serology compared to genotype predicted phenotype.** UPIN, unique patient identifier number; NP, confirmatory serology testing not performed because discrepancy explained by inheritance of alleles encoding weak antigen expression; NA, repeat specimen not available; w+, weak positive agglutination; 1+, 1+ agglutination; 2+, 2+ agglutination; \*, strength of agglutination not available.
